# Supplementary material
Source: PubMed Central journal article supplement (PMC6436352)
Supplement: JB.00577-18-s0003.pdf [file JB.00577-18-s0003.pdf]

Table S3. Primers used in this study

| Purpose                                                                                                  | Primer Sequence*                                           | Orientation         |
|----------------------------------------------------------------------------------------------------------|------------------------------------------------------------|---------------------|
| Deletion of BF638R_2714                                                                                  | cggccgctctagaactagtggtataacctaaccggaaaaag                  | left flank forward  |
|                                                                                                          | catcccacatctaattcccaaaagacttagttg                          | left flank reverse  |
|                                                                                                          | tgggaattagatgtgggatgacgatacaatac                           | right flank forward |
|                                                                                                          | cgaattcctgcagcccgggctttcactattccactcg                      | right flank reverse |
| Cloning BF638R_2714 into pET16b<br>(N-term His-tag)                                                      | cactc <u>atat</u> gtgcaataaaacagatctgatcac                 | Forward             |
|                                                                                                          | cacc <u>catat</u> gttattgtattgtatcgtcatcccac               | Reverse             |
| Deletion of M068_2717                                                                                    | cggccgctctagaactagtggtgcagtaagctccaggttg                   | left flank forward  |
|                                                                                                          | gaaagtaatggcagtcctcgtgcacaagcgcacagc                       | left flank reverse  |
|                                                                                                          | gctgtgcgcttgtgcacggactgaccattacttc                         | right flank forward |
|                                                                                                          | cgaattcctgcagcccgggggatcgtccgaagctttg                      | right flank reverse |
| Cloning BF638R_2715 into pFD340<br>(variant 1 OMP)                                                       | aatcagaattgactctagaggggatgacgatacaatacaataag               | Forward             |
|                                                                                                          | attcgagctcggtagccgggataagcatcgttcccagc                     | Reverse             |
| Cloning all variant 2 OMP genes into pFD340                                                              | attgggatcctaggtattgtcaacccttttattg                         | Forward             |
|                                                                                                          | gcagggatccataagcatcgttcccagcag                             | Reverse             |
| Cloning BFAG_02253 into pFD340<br>(3-1-12 variant 3 OMP)                                                 | agctggatcctaggtattgtaagcccttttattg                         | Forward             |
|                                                                                                          | agctggatcctgagattgttctgttatcaggtc                          | Reverse             |
| NEBuilder primers for deletion of BT1311<br>promoter upstream Nanoluc gene in pMM553                     | ctactaaaataaaaatgccaaatggttttactctggaagatttgtggc           | Forward             |
|                                                                                                          | aattcatgttatcgggagaccggccgccaccgc                          | Reverse             |
| Cloning variant 2 OMP gene promoter<br>upstream of Nanoluc gene in pMM553<br>lacking the BT1311 promoter | ctccaccggtggcggcggctcccgataacatgaattaagcatctct             | Forward             |
|                                                                                                          | tctccagagtaaaaaccatttggcatttttttagtagttagtatttaataaatgcgtt | Reverse             |
